# Supplementary material for: The Effect of Remote Ischemic Preconditioning on Serum Creatinine in Patients Undergoing Partial Nephrectomy: A Randomized Controlled Trial
Source: MDPI journal article supplement (doi:10.3390/jcm10081636), 2021-04-12
Supplement: s1 [file s1]

## Supplementary material

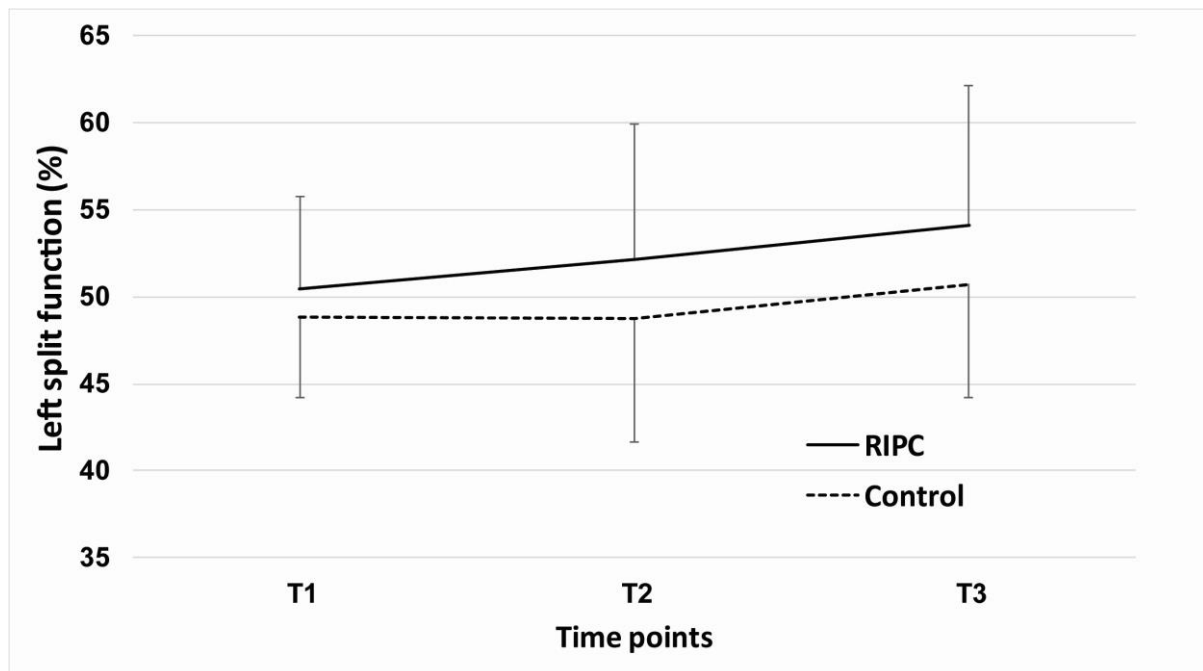

**Supplementary Figure S1.** Comparison of time dependent change of left split renal function measured by  $^{99m}\text{Tc}$ -DTPA renal scintigraphy between RIPC and control group. The time points were defined as preoperative (T1), 6 month after surgery (T2) and 12~18 month after surgery (T3).

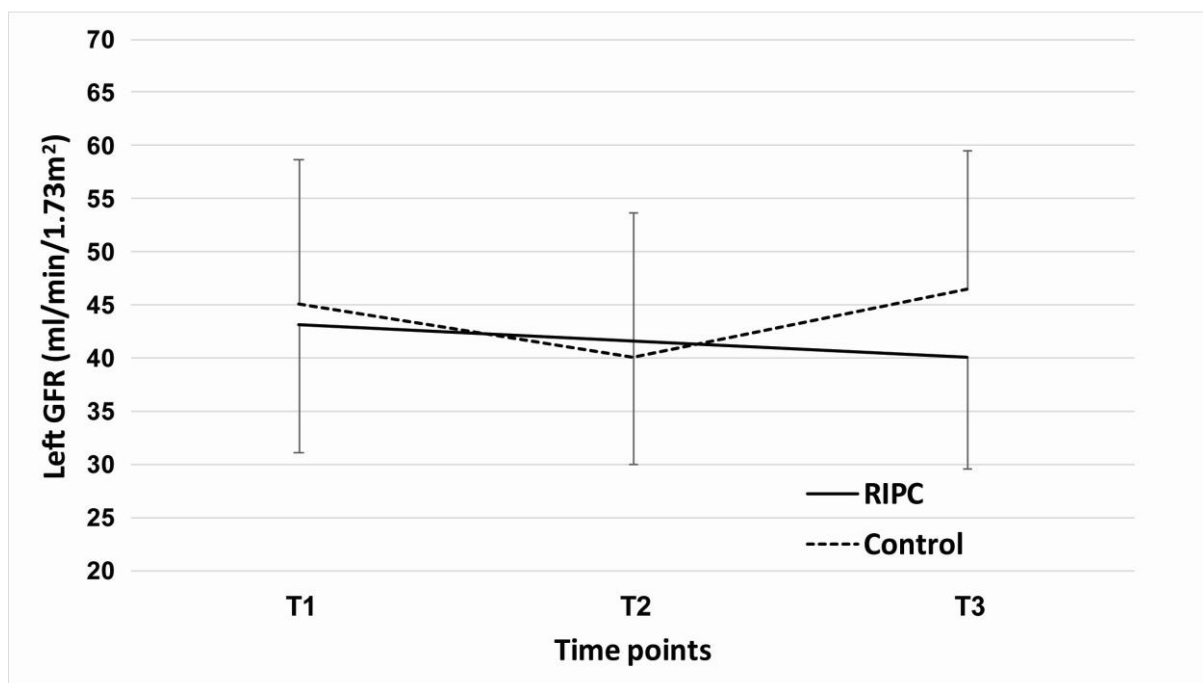

**Supplementary Figure S2.** Comparison of time dependent change of left glomerular filtration rate measured by  $^{99m}\text{Tc}$ -DTPA renal scintigraphy between RIPC and control group. The time points were defined as preoperative (T1), 6 month after surgery (T2) and 12~18 month after surgery (T3).

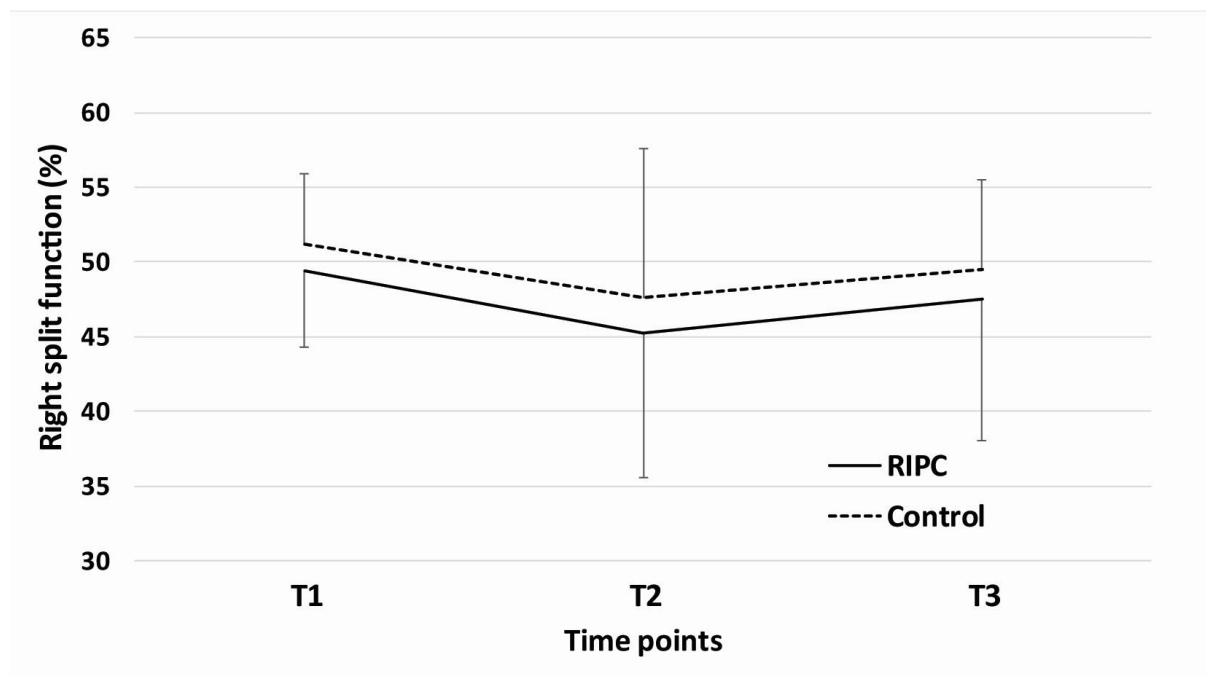

**Supplementary Figure S3.** Comparison of time dependent change of right split renal function measured by  $^{99m}\text{Tc}$ -DTPA renal scintigraphy between RIPC and control group. The time points were defined as preoperative (T1), 6 month after surgery (T2) and 12~18 month after surgery (T3).

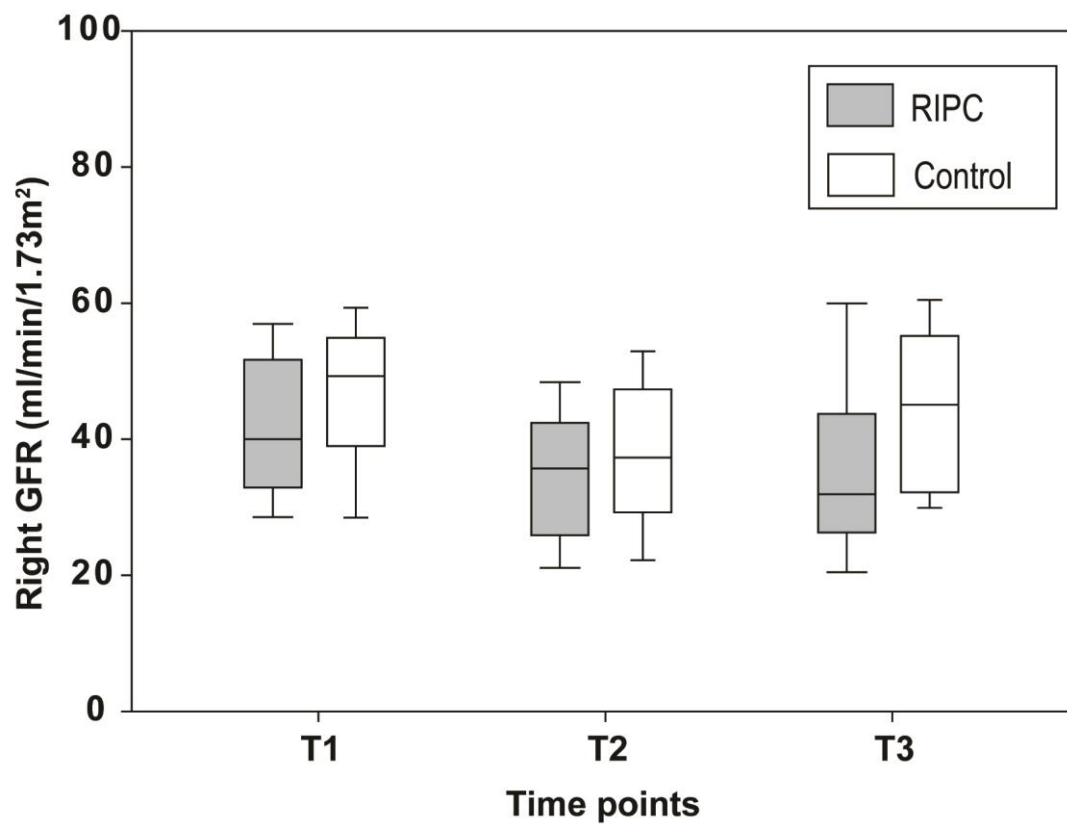

**Supplementary Figure S4.** Comparison of time dependent change of right glomerular filtration rate measured by  $^{99m}\text{Tc}$ -DTPA renal scintigraphy between RIPC and control group. The time points were defined as preoperative (T1), 6 month after surgery (T2) and 12~18 month after surgery (T3).

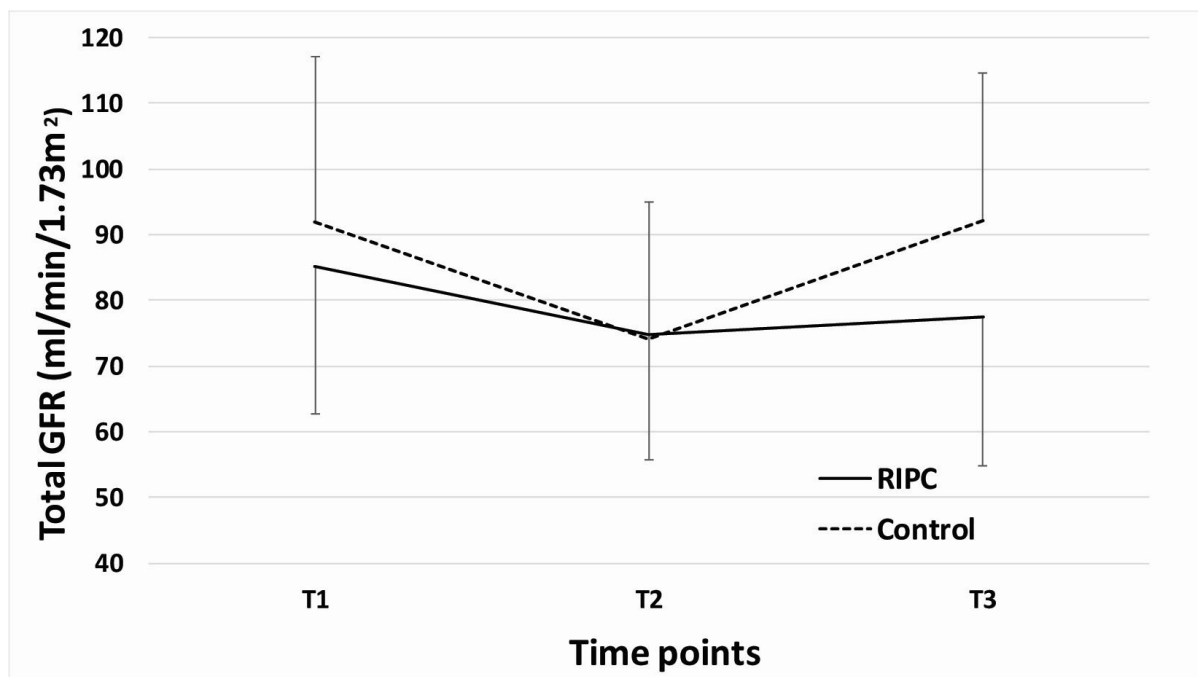

**Supplementary Figure S5.** Comparison of time dependent change of total glomerular filtration rate measured by  $^{99m}\text{Tc}$ -DTPA renal scintigraphy between RIPC and control group. The time points were defined as preoperative (T1), 6 month after surgery (T2) and 12~18 month after surgery (T3).

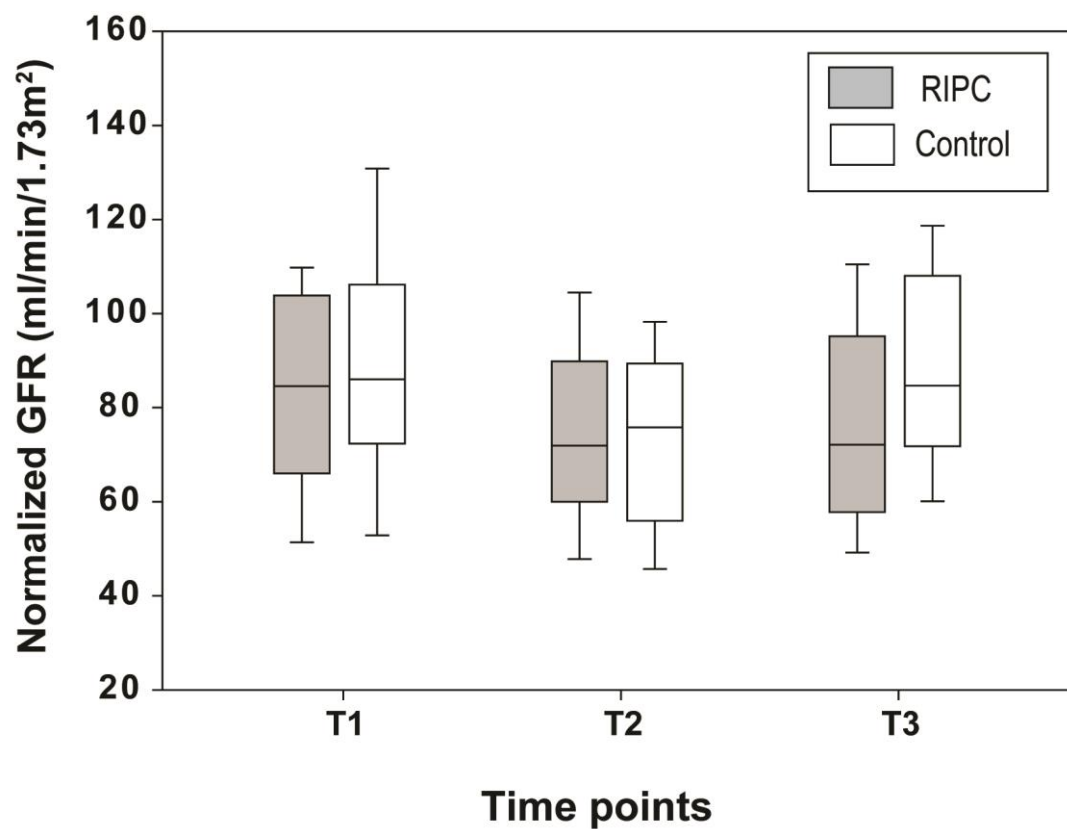

**Supplementary Figure S6.** Comparison of time dependent change of normalized glomerular filtration rate measured by  $^{99m}\text{Tc}$ -DTPA renal scintigraphy between RIPC and control group. The time points were defined as preoperative (T1), 6 month after surgery (T2) and 12~18 month after surgery (T3).

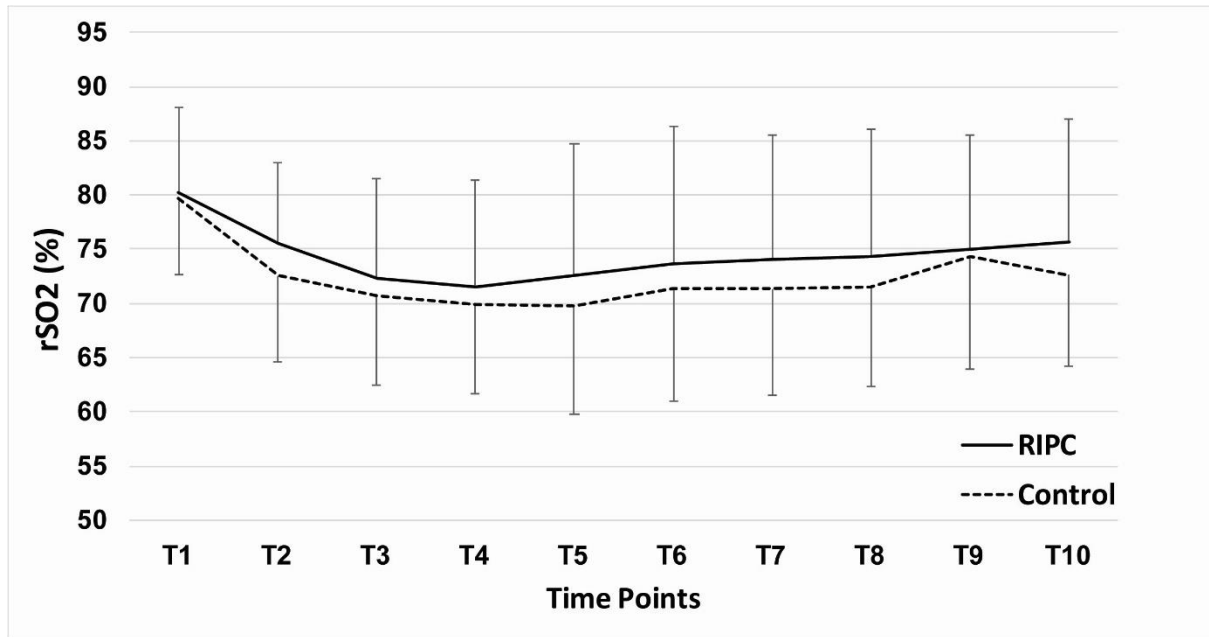

**Supplementary Figure S7.** Comparison of time dependent change of regional O<sub>2</sub> saturation (rSO<sub>2</sub>) during partial nephrectomy between RIPC and control group. The rSO<sub>2</sub> was measured intraoperatively from baseline (T1) to 90 minutes after surgery (T10) for every 10 minutes.

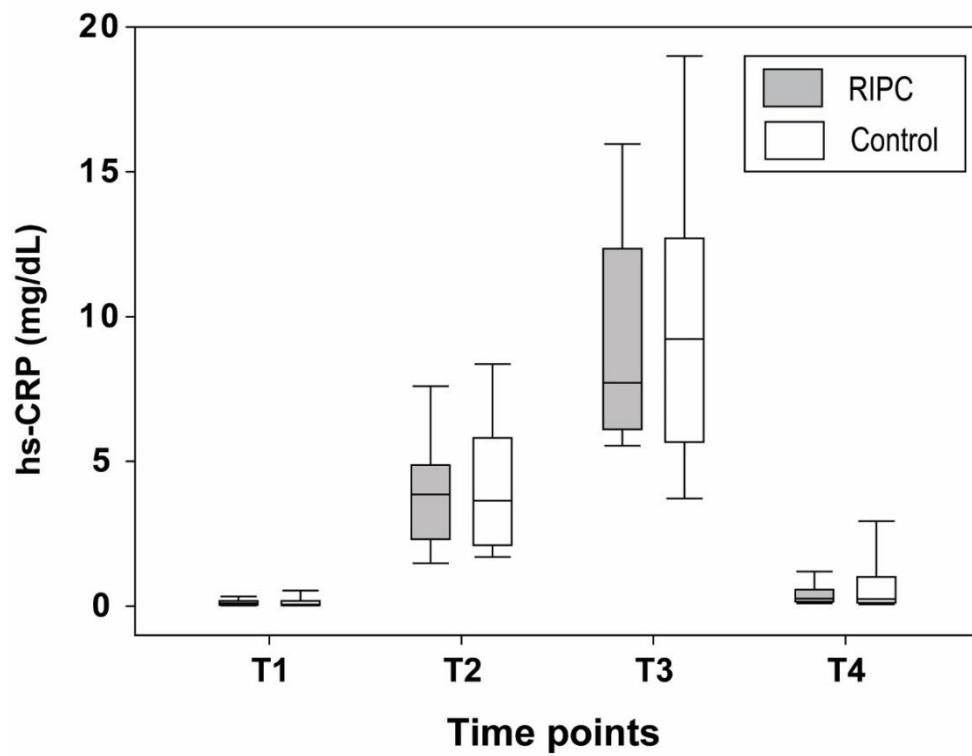

**Supplementary Figure S8.** Comparison of time dependent change of high sensitive C-reactive protein between RIPC and control group. Time points were defined as preoperative (T1), postoperative day 1 (T2), postoperative day 3 (T3), and two weeks after surgery (T4).

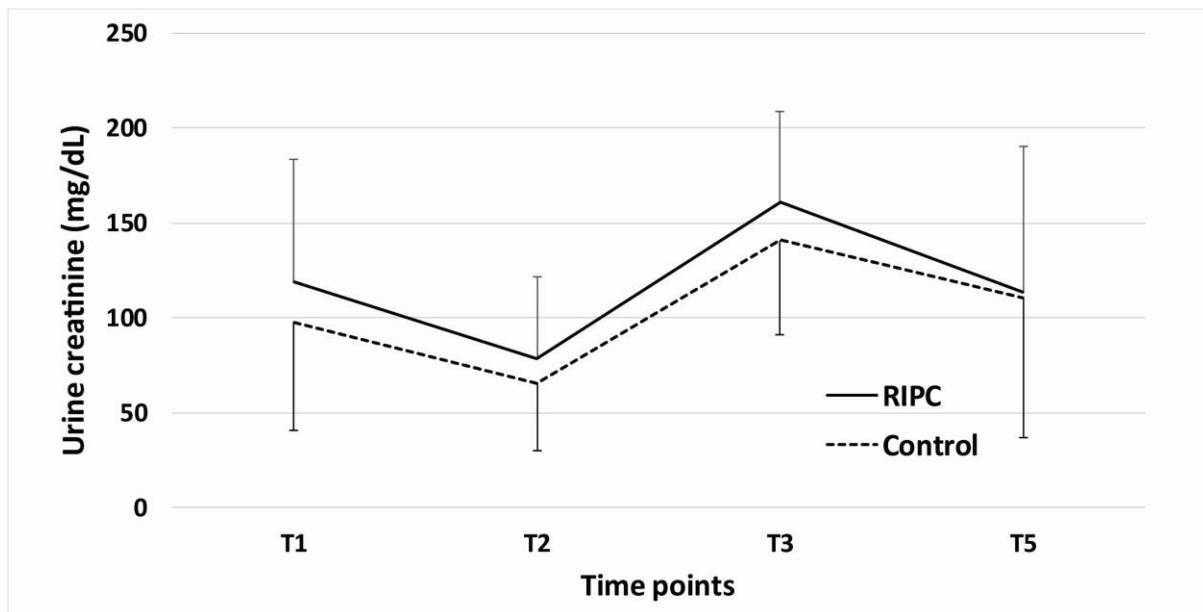

**Supplementary Figure S9.** Comparison of time dependent change of urine creatinine between RIPC and control group. Time points were defined as preoperative (T1), at post-anesthesia care unit (T2), postoperative day 1 (T3), and two weeks after surgery (T4).

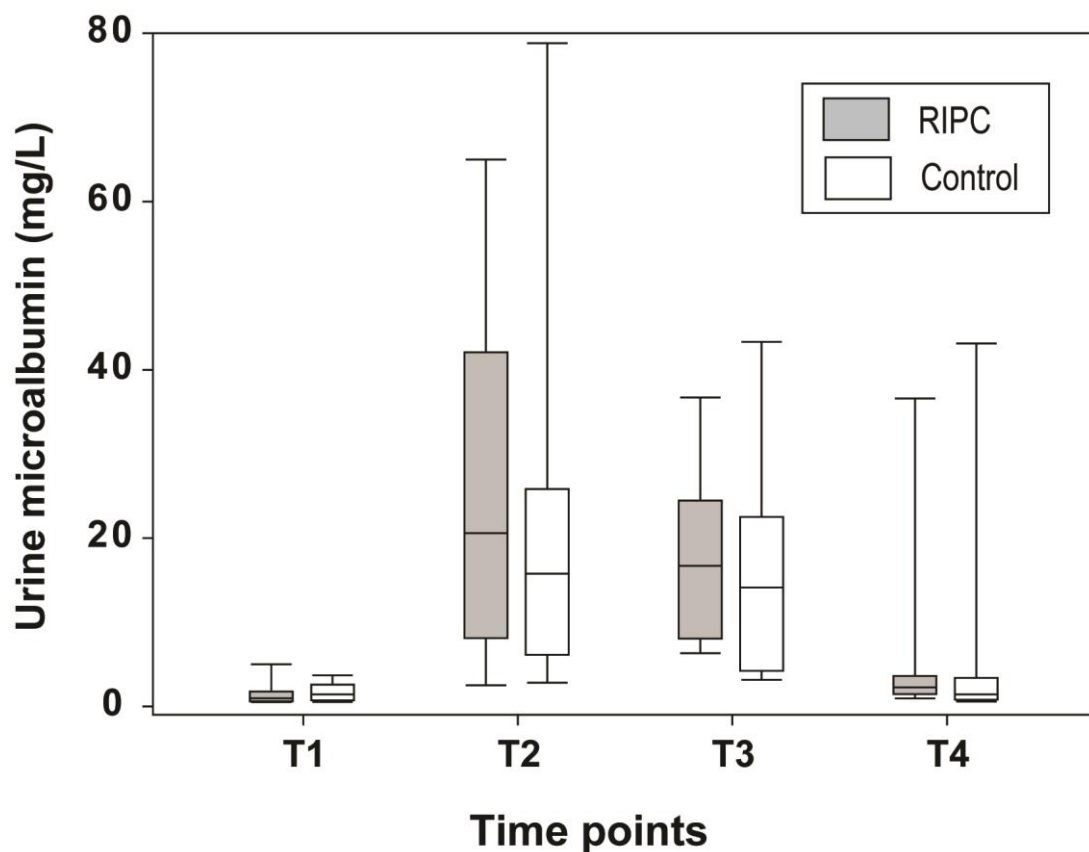

**Supplementary Figure S10.** Comparison of time dependent change of urine microalbumin between RIPC and control group. Time points were defined as preoperative (T1), at post-anesthesia care unit (T2), postoperative day 1 (T3), and two weeks after surgery (T4).

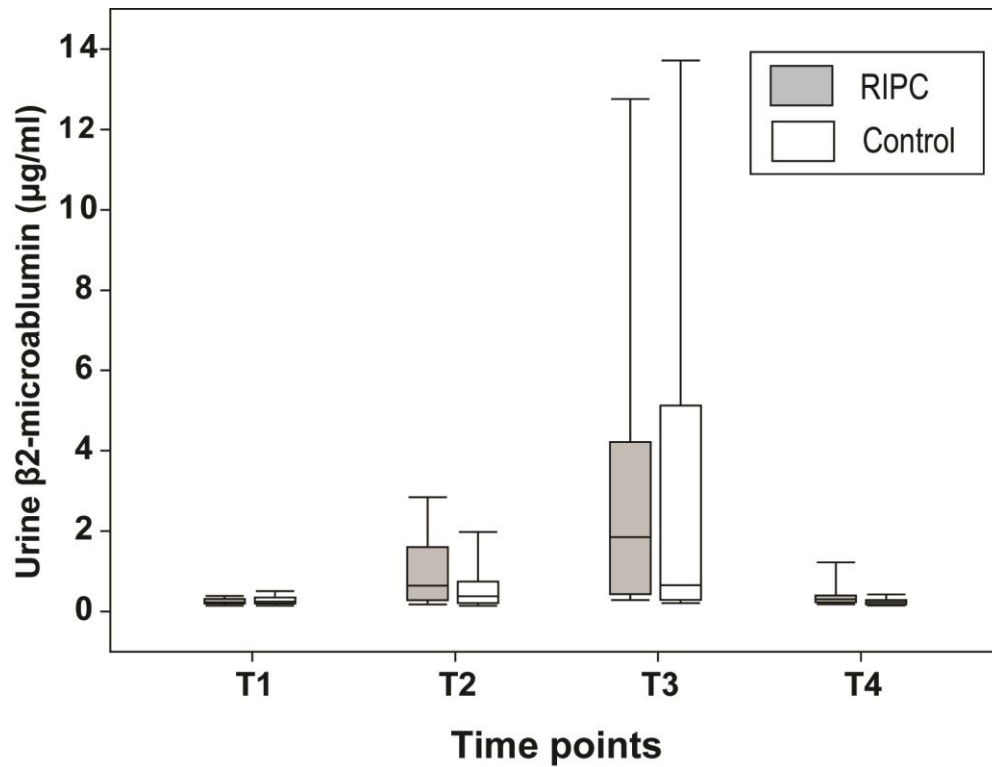

**Supplementary Figure S11.** Comparison of time dependent change of urine  $\beta$ -2 microglobulin between RIPC and control group. Time points were defined as preoperative (T1), at post-anesthesia care unit (T2), postoperative day 1 (T3), and two weeks after surgery (T4).

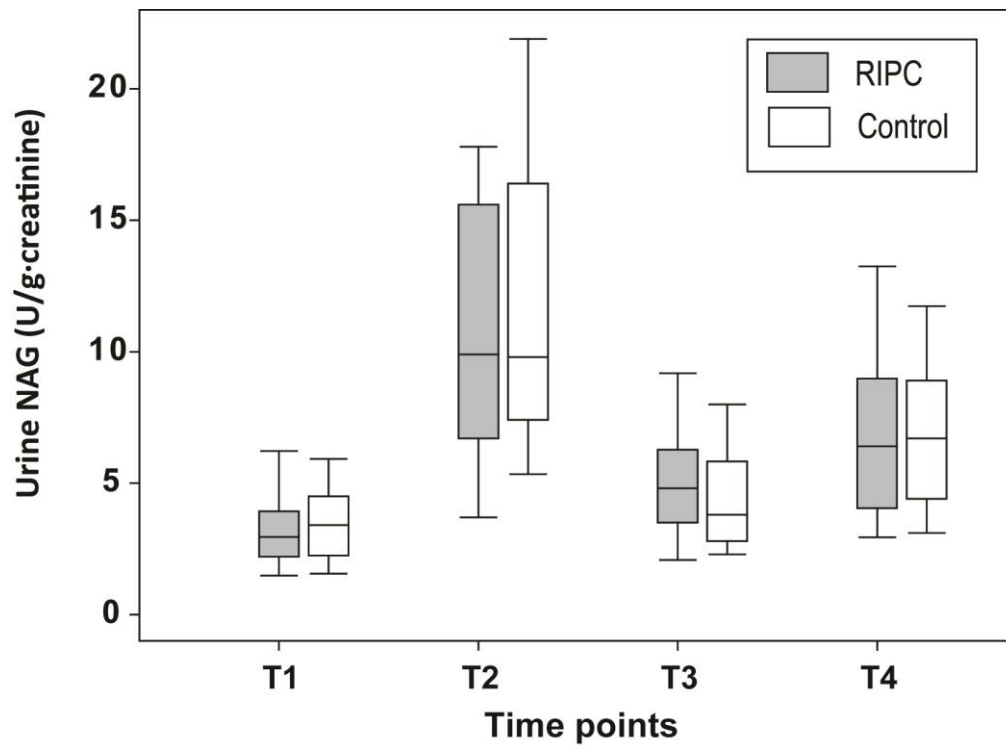

**Supplementary Figure S12.** Comparison of time dependent change of urine N-acetyl-beta-D-glucosaminidase (NAG) between RIPC and control group. Time points were defined as preoperative (T1), at post-anesthesia care unit (T2), postoperative day 1 (T3), and two weeks after surgery (T4).
